# Supplementary material for: Acute Pain in the African Prehospital Setting: A Scoping Review
Source: Hindawi journal article supplement (doi:10.1155/2019/2304507), 2019-04-16
Supplement: f2 [file 2304507.f2.pdf]

## Scoping Review Eligibility Form:

**Scoping Review Aim:**

The overall aim of this review is to identify and map the body of evidence related to acute pain assessment and management in the pre-hospital setting, in Africa and to identify gaps in current evidence.

**Reviewer Details:**

|                  |                       |
|------------------|-----------------------|
| <b>Reviewer:</b> | <b>Date Assessed:</b> |
| Choose an item.  |                       |

**Study Details:**

|                     |                          |
|---------------------|--------------------------|
| <b>Authors:</b>     | <b>Year Published:</b>   |
|                     |                          |
| <b>Study Title:</b> | <b>Reference Number:</b> |
|                     |                          |

**1) Type of Research:**

|                                                                                                                                                                                                                                                                                                                                                                                                                                                                                                                                                                                                                                                              |         |                          |
|--------------------------------------------------------------------------------------------------------------------------------------------------------------------------------------------------------------------------------------------------------------------------------------------------------------------------------------------------------------------------------------------------------------------------------------------------------------------------------------------------------------------------------------------------------------------------------------------------------------------------------------------------------------|---------|--------------------------|
| <b>Question:</b>                                                                                                                                                                                                                                                                                                                                                                                                                                                                                                                                                                                                                                             |         |                          |
| <p><b>Do the study design include a design as stipulate (inclusion criteria) in the list below?</b></p> <ul style="list-style-type: none"> <li>• Review research designs: Systematic reviews and meta-analysis</li> <li>• Experimental designs: Randomized Controlled Trials (RCT) or Non-randomized controlled trails or quasi-experimental</li> <li>• Observational studies: Cohort studies, Case-control studies, Cross-sectional studies or Surveys</li> <li>• Qualitative design</li> <li>• Evidence-based guidelines</li> </ul> <p><b>Note:</b> The following study designs will not be included: Literature reviews, Case Reports and Case Series</p> | Yes     | <input type="checkbox"/> |
|                                                                                                                                                                                                                                                                                                                                                                                                                                                                                                                                                                                                                                                              | No      | <input type="checkbox"/> |
|                                                                                                                                                                                                                                                                                                                                                                                                                                                                                                                                                                                                                                                              | Unclear | <input type="checkbox"/> |

**2) Type of Participants:**

|                                                                                                                                                                                                                                                                                                                              |         |                          |
|------------------------------------------------------------------------------------------------------------------------------------------------------------------------------------------------------------------------------------------------------------------------------------------------------------------------------|---------|--------------------------|
| <b>Question:</b>                                                                                                                                                                                                                                                                                                             |         |                          |
| <p><b>Do the study population include adults and paediatrics (&gt; 28 days or 1 month) participants?</b></p> <p><b>OR</b></p> <p><b>Pain assessment and management by emergency care providers, physicians and/or nurses in the pre-hospital setting.</b></p> <p><b>Note:</b> Neonates (0-28 days) will not be included.</p> | Yes     | <input type="checkbox"/> |
|                                                                                                                                                                                                                                                                                                                              | No      | <input type="checkbox"/> |
|                                                                                                                                                                                                                                                                                                                              | Unclear | <input type="checkbox"/> |

3) Timeframe:

|                                                                                                 |         |                          |
|-------------------------------------------------------------------------------------------------|---------|--------------------------|
| <b>Question:</b>                                                                                |         |                          |
| <b>Was the study conducted on or after the 1<sup>st</sup> of January 2000?</b>                  | Yes     | <input type="checkbox"/> |
|                                                                                                 | No      | <input type="checkbox"/> |
|                                                                                                 | Unclear | <input type="checkbox"/> |
| <b>Note:</b> Studies conducted before the 1 <sup>st</sup> of January 2000 will not be included. |         |                          |

4) Study Setting:

|                                                                                                                                                                                                 |         |                          |
|-------------------------------------------------------------------------------------------------------------------------------------------------------------------------------------------------|---------|--------------------------|
| <b>Question:</b>                                                                                                                                                                                |         |                          |
| <b>Is the study conducted in the pre-hospital setting in Africa [studies conducted in the aero-medical (helicopter and fixed-wing) setting and ground ambulance services will be included]?</b> | Yes     | <input type="checkbox"/> |
|                                                                                                                                                                                                 | No      | <input type="checkbox"/> |
|                                                                                                                                                                                                 | Unclear | <input type="checkbox"/> |
| <b>Note:</b> Studies conducted in-hospital and studies related to inter-facility transfers of critically ill and injured patients will not be included.                                         |         |                          |

5) Eligible for Inclusion:

|                                                      |         |                          |
|------------------------------------------------------|---------|--------------------------|
| <b>Question:</b>                                     |         |                          |
| <b>Do the study meet all the inclusion criteria?</b> | Yes     | <input type="checkbox"/> |
|                                                      | No      | <input type="checkbox"/> |
|                                                      | Unclear | <input type="checkbox"/> |

6) Comments (stipulate any comments, concerns or uncertainty regarding eligibility):
